# Supplementary material for: Multifunctional AgNWs-Fe3O4/ANF composite films with a Janus-like structure for outstanding electromagnetic interference shielding and thermal management
Source: Royal Society of Chemistry journal article supplement (doi:10.1039/d4ta06252c), 2025-01-01
Supplement: d4ta06252c1.pdf [file d4ta06252c1.pdf]

## Supporting information

### *Multifunctional AgNWs-Fe<sub>3</sub>O<sub>4</sub>/ANF Composite Films with Janus like Structure for outstanding electromagnetic interference shielding and thermal management*

Jiyan Wei<sup>a,b</sup>, Xinxin Cai<sup>a,b</sup>, Jiwen Hu<sup>a,b</sup>, Shudong Lin<sup>a,b\*</sup>

<sup>a</sup> Guangzhou Institute of Chemistry, Chinese Academy of Sciences, Guangzhou 510650, P. R. China

<sup>b</sup> University of Chinese Academy of Sciences, Beijing 100049, P. R. China

\*Corresponding author at: Guangzhou Institute of Chemistry, Chinese Academy of Sciences, Guangzhou 510650, PR China.

E-mail address: linsd@gic.ac.cn (S. Lin).

### 3.1. Characterization of AgNWs-Fe<sub>3</sub>O<sub>4</sub>/ANF composite film

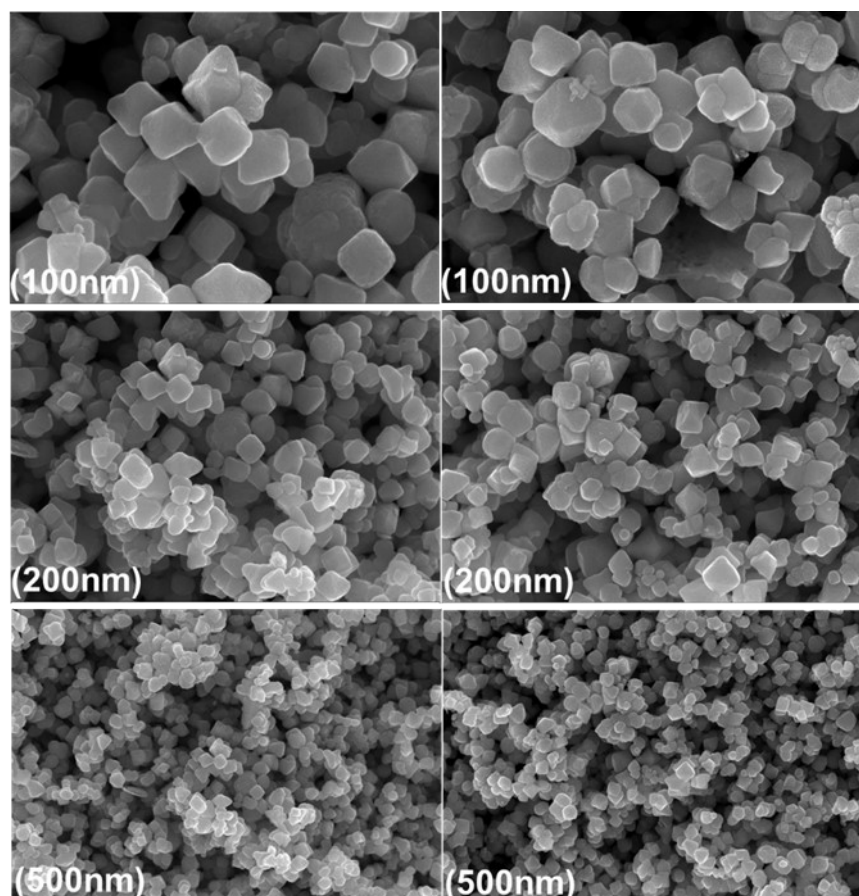

Fig. S1. SEM image of Fe<sub>3</sub>O<sub>4</sub>.

### 3.5. Photothermal conversion performance of the Janus AgNWs-Fe<sub>3</sub>O<sub>4</sub>/ANF composite film.

The heat transfer processes of ANF, Fe<sub>3</sub>O<sub>4</sub>/ANF and AgNWs-Fe<sub>3</sub>O<sub>4</sub>/ANF composite films were modeled by COMSOL Multiphysics software. The ANF composite films with a diameter of 25mm and a thickness of 60  $\mu$ m was contacted with the top surface of heat source, with a diameter of 7mm and a thickness of 3mm.

Afterwards, the two-dimensional model was established to study the effect of filler on the thermal conductivity of composite films. There was a square composite (5 $\mu$ m $\times$ 5 $\mu$ m) and a bottom heat source with a temperature of 100  $^{\circ}$ C. In addition, the circular Fe<sub>3</sub>O<sub>4</sub>

particle was with a diameter of 200 nm<sup>1,2</sup>.

## References

1. H. Zhang, G. Zhang, J. Li, X. Fan, Z. Jing, J. Li and X. Shi, *Compos. Part A*, 2017, **100**, 128-138.
2. J. Rhyou, J. Youn, S. Eom and D. S. Kim, *ACS Macro Lett.*, 2021, **10**, 965-970.
